# Supplementary material
Source: PubMed Central journal article supplement (PMC2325917)
Supplement: NIHMS42297-supplement-2.pdf [file NIHMS42297-supplement-2.pdf]

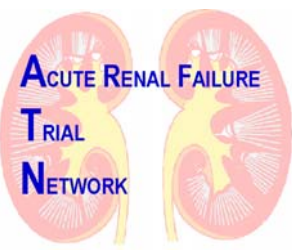

Acute Renal Failure Trial Network  
Survey of Practitioner Prescribing Practices

1. Which of the following best describes your specialty?
  - Nephrologist
  - Intensivist
2. Approximately how many critically ill patients with ARF do you treat who require renal replacement therapy?
  - \_\_\_ \_\_\_ per month
3. Do you prescribe intermittent hemodialysis for critically ill patients with ARF?
  - Yes
  - No (skip to question 10)
4. Approximately what percentage of critically ill patients with ARF who require renal replacement therapy do you treat with intermittent hemodialysis?
  - \_\_\_ \_\_\_ %
5. For critically ill patients with ARF treated with intermittent hemodialysis, estimate the percentage of patients for whom you prescribe each of the following treatment schedules?
  - \_\_\_ \_\_\_ % 2x/week
  - \_\_\_ \_\_\_ % 3x/week
  - \_\_\_ \_\_\_ % 4x/week
  - \_\_\_ \_\_\_ % 5x/week
  - \_\_\_ \_\_\_ % 6x/week
  - \_\_\_ \_\_\_ % every other day
  - \_\_\_ \_\_\_ % daily
6. What is the typical prescription that you use when prescribing intermittent hemodialysis in critically ill patients with ARF?
  - Blood flow rate: \_\_\_ \_\_\_ mL/min
  - Treatment duration: \_\_\_ . \_\_\_ hours
7. What target dose of therapy do you aim for in prescribing intermittent hemodialysis for critically ill patients with ARF?
  - \_\_\_ . \_\_\_ spKt/V or \_\_\_ % URR
  - no specific target dose
8. Do you routinely measure the delivered dose of hemodialysis in critically ill patients with ARF?
  - Yes
  - No (skip to question 10)
9. How frequently do you measure the delivered dose of hemodialysis in critically ill patients with ARF?
  - 1x/week
  - 2x/week
  - 3x/week
  - more than 3x/week

- 1  
2  
3  
4  
5  
6  
7  
8  
9  
10  
11  
12  
13  
14  
15  
16  
17  
18  
19  
20  
21  
22  
23  
24  
25  
26  
27  
28  
29  
30  
31  
32  
33  
34  
35  
36  
37  
38  
39  
40  
41  
42  
43  
44  
45  
46  
47  
48  
49  
50  
51  
52  
53  
54  
55  
56  
57  
58  
59  
60
10. Do you prescribe sustained, low-efficiency dialysis (SLED) or other forms of “slow” hemodialysis for critically ill patients with ARF?  
 Yes  
 No (skip to question 17)
11. Approximately what percentage of critically ill patients with ARF who require renal replacement therapy do you treat with SLED or other forms of “slow” hemodialysis?  
\_\_\_ %
12. For critically ill patients with ARF treated with SLED or other forms of “slow” hemodialysis, estimate the percentage of patients who you prescribe each of the following treatment schedules?  
\_\_\_ % 2x/week  
\_\_\_ % 3x/week  
\_\_\_ % 4x/week  
\_\_\_ % 5x/week  
\_\_\_ % 6x/week  
\_\_\_ % every other day  
\_\_\_ % daily
13. What is the typical prescription that you use when prescribing SLED or other forms of “slow” hemodialysis in critically ill patients with ARF?  
Blood flow rate: \_\_\_ mL/min  
Dialysate flow rate: \_\_\_ mL/min  
Treatment duration: \_\_\_ hours
14. What target dose of therapy do you aim for in prescribing SLED or other forms of “slow” hemodialysis for critically ill patients with ARF?  
\_\_\_ spKt/V or \_\_\_ % URR  
 no specific target dose
15. Do you routinely measure the delivered dose of SLED or other forms of “slow” hemodialysis in critically ill patients with ARF?  
 Yes  
 No (skip to question 17)
16. How frequently do you measure the delivered dose of SLED or other forms of “slow” hemodialysis in critically ill patients with ARF?  
 1x/week  
 2x/week  
 3x/week  
 more than 3x/week
17. Do you prescribe continuous renal replacement therapy (CRRT) for critically ill patients with ARF?  
 Yes  
 No (skip to end)
18. Approximately what percentage of critically ill patients with ARF who require renal replacement therapy do you treat with CRRT?  
\_\_\_ %

- 1  
2  
3  
4  
5  
6  
7  
8  
9  
10  
11  
12  
13  
14  
15  
16  
17  
18  
19  
20  
21  
22  
23  
24  
25  
26  
27  
28  
29  
30  
31  
32  
33  
34  
35  
36  
37  
38  
39  
40  
41  
42  
43  
44  
45  
46  
47  
48  
49  
50  
51  
52  
53  
54  
55  
56  
57  
58  
59  
60
19. What modalities of CRRT do you utilize?
- Continuous arteriovenous hemofiltration (CAVH)
  - Continuous arteriovenous hemodialysis (CAVHD)
  - Continuous arteriovenous hemodiafiltration (CAVHDF)
  - Continuous venovenous hemofiltration (CVVH)
  - Continuous venovenous hemodialysis (CVVHD)
  - Continuous venovenous hemodiafiltration (CVVHDF)
20. What blood flow rate do you usually prescribe for patients treated with CRRT?
- \_\_ \_\_ \_\_ mL/min
- arteriovenous therapy – blood flow rate not specified
21. Do you prescribe CRRT based on patient weight?
- Yes (answer question 22 and then skip to question 24)
  - No (skip to question 13)
22. What effluent flow rate (sum of replacement fluid, dialysate and net ultrafiltration rate) do you aim for in patients treated with CRRT?
- \_\_ \_\_ \_\_ mL/kg/hr
23. What effluent flow rate (sum of replacement fluid, dialysate and net ultrafiltration rate) do you aim for in patients treated with CRRT?
- \_\_ \_\_ \_\_ \_\_ mL/hr
24. What fluid do you use for dialysate in patients treated with CRRT?
- Lactate-buffered dialysate
  - Priskasate
  - Normocarb
  - Other: \_\_\_\_\_
  - Do not use dialysate
25. What fluid do you use for replacement fluid in patients treated with CRRT?
- Lactate-buffered hemofiltration fluid
  - Priskasate
  - Normocarb
  - Other: \_\_\_\_\_
  - Do not use replacement fluid
26. Please identify your institution:
- |                                          |                                                                        |
|------------------------------------------|------------------------------------------------------------------------|
| <input type="checkbox"/> Ann Arbor VA    | <input type="checkbox"/> San Francisco VA                              |
| <input type="checkbox"/> Buffalo VA      | <input type="checkbox"/> San Juan VA                                   |
| <input type="checkbox"/> Dallas VA       | <input type="checkbox"/> Seattle VA                                    |
| <input type="checkbox"/> Houston VA      | <input type="checkbox"/> West Haven VA                                 |
| <input type="checkbox"/> Indianapolis VA |                                                                        |
| <input type="checkbox"/> Little Rock VA  | <input type="checkbox"/> Cleveland Clinic Foundation                   |
| <input type="checkbox"/> Long Beach VA   | <input type="checkbox"/> Johns Hopkins Hospital                        |
| <input type="checkbox"/> Los Angeles VA  | <input type="checkbox"/> Massachusetts General Hospital                |
| <input type="checkbox"/> Miami VA        | <input type="checkbox"/> University of California, San Francisco       |
| <input type="checkbox"/> New Orleans VA  | <input type="checkbox"/> University of Miami/Jackson Memorial Hospital |
| <input type="checkbox"/> Pittsburgh VA   | <input type="checkbox"/> University of Pittsburgh Medical Center       |
| <input type="checkbox"/> Portland VA     | <input type="checkbox"/> University of Texas at Houston                |
| <input type="checkbox"/> Richmond VA     | <input type="checkbox"/> Wake Forrest University                       |
| <input type="checkbox"/> San Diego VA    | <input type="checkbox"/> Washington University in St. Louis            |
